# American Neuropsychiatric Association

The American Neuropsychiatric Association (ANPA), established in 1988, is an organization of professionals in neuropsychiatry, behavioral neurology, neuropsychology and the clinical neurosciences. Our mission is to improve the lives of people with disorders at the interface of psychiatry and neurology through clinical care, education, advocacy and research.

The strength of the organization is our diversity of membership, which is comprised of professionals in neuropsychiatry, behavioral neurology, neuropsychology, neuroradiology, neuropathology, and neurosurgery as well as the basic neurosciences, who share clinical and/or academic interests in neuropsychiatry. The interdisciplinary nature of the membership encourages collaboration among educators, clinicians, researchers, students and trainees in research presentations, symposia, workshops and/or continuing education courses. *The Journal of Neuropsychiatry and Clinical Neurosciences (JNCN)* is the official publication of the organization, and is a benefit of membership.

ANPA holds an annual scientific meeting and provides up to 30 CME/CE credits. Members are encouraged to submit their work for presentation at these annual meetings. Travel awards are available for promising young investigators. Annual meeting abstracts and proceedings are published in *JNCN*.

ANPA has taken an active role in the creation of subspecialty certification for neuropsychiatry including developing a core curriculum and setting up guidelines for training in neuropsychiatry. As a result, Behavioral Neurology & Neuropsychiatry was approved as a subspecialty by the Unified Council for Neurologic Subspecialties (UCNS) in 2004.

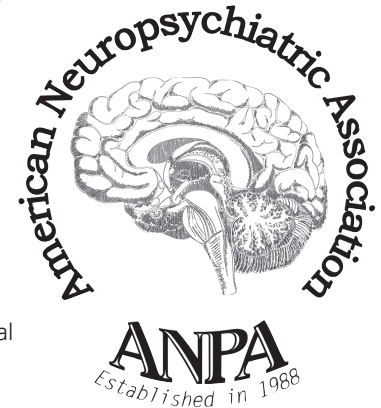

## Contact Information

### Benefits of Membership

- Subscription to *The Journal of Neuropsychiatry and Clinical Neurosciences (JNCN)*
- Discounted membership and meeting registration fees for trainees
- Collaboration in clinical, educational and research activities and the opportunity to interact with senior colleagues
- Discount on subscriptions to PsychiatryOnline.com including DSM Premium and DSM Premium Plus
- Opportunity to participate on committees and in the future leadership of ANPA
- Opportunities for presentation at the annual meeting with accepted abstracts published in the *JNCN*
- Opportunity to participate in on-line forums for discussion of research, clinical cases and/or current issues related to neuropsychiatric practice
- Significantly reduced registration fees at the annual meeting
- Opportunity to join Special Interest Groups for members who have common interests in specific research, clinical cases, practice issues or educational areas
- Newsletters, news updates, information on job and training opportunities, research and meeting information on the ANPA web site: [www.anpaonline.org](http://www.anpaonline.org)

Website:  
[www.anpaonline.org](http://www.anpaonline.org)

Email:  
[anpa@osu.edu](mailto:anpa@osu.edu)

Phone:  
614-447-2077

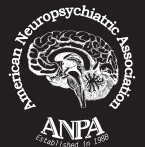

### Join ANPA Now!

Don't miss ANPA's 21<sup>st</sup> Annual Meeting  
Tampa Marriott Waterside Hotel  
and Marina  
March 17 – 20, 2010

# Tampa, Florida

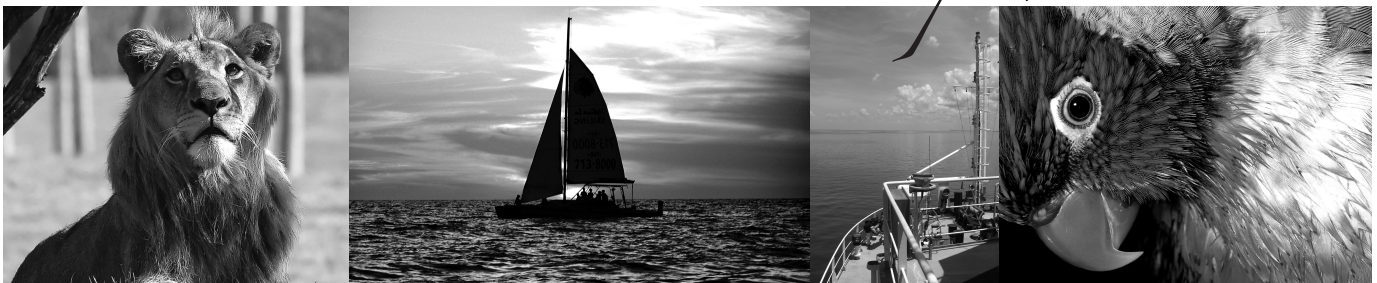

Join online at: <http://www.anpaonline.org/10117.cfm>

# American Neuropsychiatric Association

21<sup>st</sup> Annual Meeting

The Marriott Tampa Waterside Hotel and Marina

**March 17-20, 2010**

*Tampa*  
ANPA's 21<sup>st</sup> Annual Meeting  
*Florida*

## Meeting Announcement & Call for Abstracts

[www.anpaonline.org](http://www.anpaonline.org)

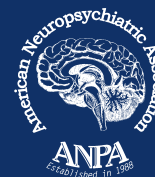

You are invited to submit abstracts reporting new research or challenging clinical cases for poster or platform presentations.

Abstracts presented at the meeting will be published on-line in the spring 2010 issue of the *Journal of Neuropsychiatry and Clinical Neurosciences*.

Travel awards may be given to one or more of the young investigators submitting the most promising abstracts.

Deadline for receipt of abstracts is **October 21, 2009**.

Complete submission instructions and meeting information are available at:  
**[www.anpaonline.org](http://www.anpaonline.org)**

For more information contact Sandy Bornstein at the ANPA Central Office:  
700 Ackerman Road, Suite 625  
Columbus, Ohio USA 43202  
Phone: 614-447-2077  
E-mail: [anpa@osu.edu](mailto:anpa@osu.edu)

### Don't miss ANPA's 21<sup>st</sup> annual meeting

#### Keynote Address:

*Daniel R. Weinberger, M.D. – Genes and Mental Illness: What's the Connection?*

#### Sessions will include:

- Neurocognitive Disorders in DSM-V: Neuropsychiatric, DSM and Regulatory Perspectives
- Social and Moral Cognition
- The Neuropsychiatry of Psychosis
- Role and Mechanism of Antidepressants on Mortality and Recovery from Stroke
- Normal Pressure Hydrocephalus: Taking A Walk Down Memory Lane
- Antecedents of Mental Illness: The Development and Functional Anatomy of the Cortico-limbic System
- An Evidence-based Review of Treatment Efficacy in Tourette Syndrome

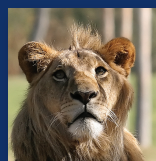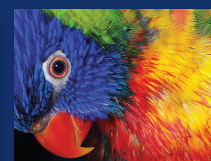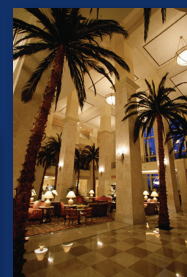

#### Earn up to 28.75 CME credits for physicians.

This activity has been planned and implemented in accordance with the Essential Areas and policies of the Accreditation Council for Continuing Medical Education through the joint sponsorship of The Ohio State University Medical Center, Center for Continuing Medical Education and American Neuropsychiatric Association. The Ohio State University Medical Center, Center for Continuing Medical Education is accredited by the ACCME to provide continuing medical education for physicians. The Ohio State University Medical Center designates this educational activity for a maximum of 28.75 *AMA PRA Category 1 Credit(s)*<sup>™</sup>. Physicians should only claim credit commensurate with the extent of their participation in the activity.

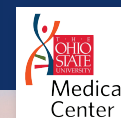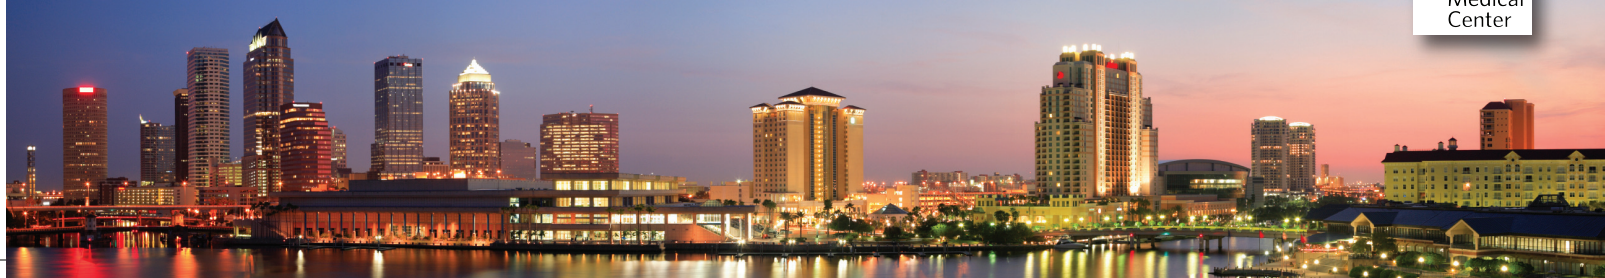

Source: https://neuro.psychiatryonline.org/doi/suppl/10.1176/jnp.2009.21.issue-3/suppl_file/back.pdf
