# THE JOURNAL OF NEUROPSYCHIATRY and Clinical Neurosciences

The Official Journal of the American Neuropsychiatric Association

## In this issue:

- Behavioral Neurology and Neuropsychiatry Fellowship Training: The Johns Hopkins Model
- Evaluating the Affective Component of the Cerebellar Cognitive Affective Syndrome
- Neuroimaging Correlates of Apathy and Depression in Alzheimer's Disease
- Apathy After Hip Fracture: A Potential Target for Intervention to Improve Functional Outcomes
- Quantitative EEG Abnormalities are Associated with Memory Impairment in Recently Abstinent Methamphetamine-Dependent Individuals

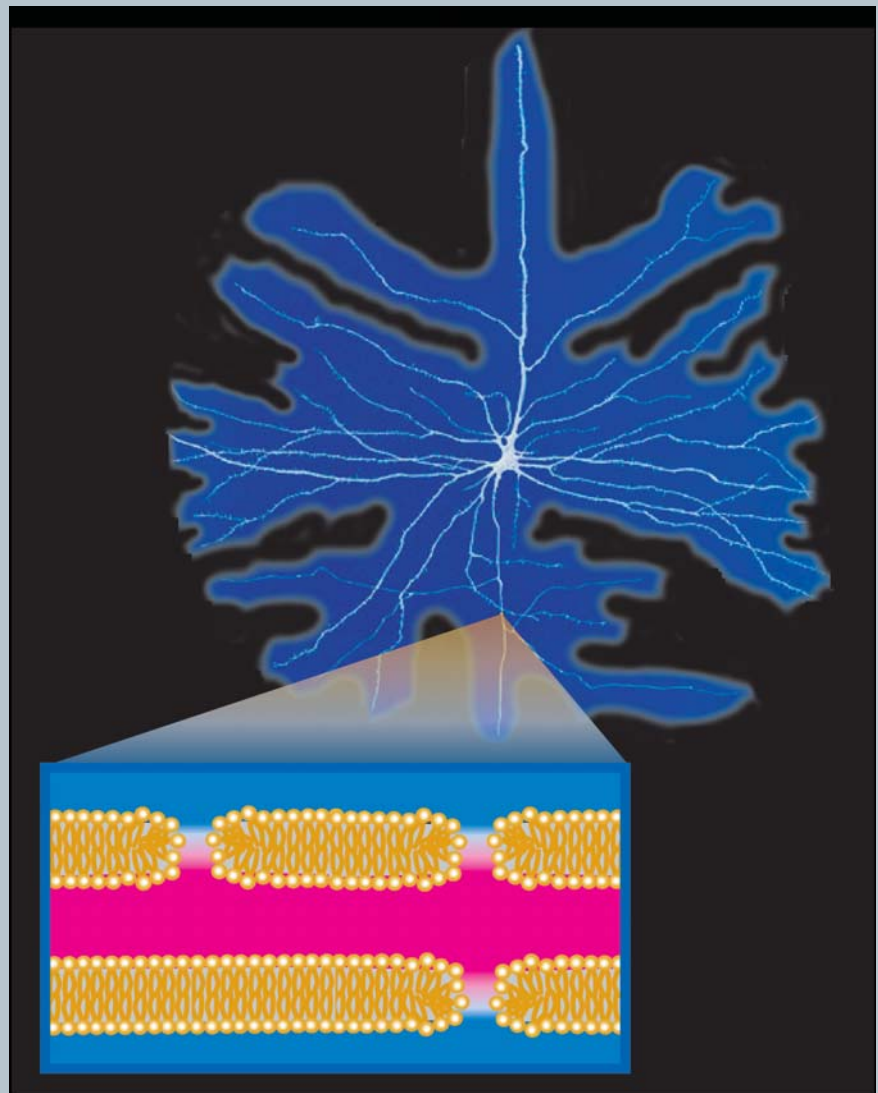

Source: https://psychiatryonline.org/doi/suppl/10.1176/jnp.2009.21.issue-3/suppl_file/cover.pdf
